# Supplementary material for: Impact of additives on syntrophic propionate and acetate enrichments under high-ammonia conditions
Source: Springer Nature journal article supplement (doi:10.1007/s00253-024-13263-7), 2024-08-07
Supplement: MOESM1 [file 253_2024_13263_MOESM1_ESM.pdf]

## **Supplementary Information (SI)**

### **Applied Microbiology and Biotechnology**

#### **Impact of additives on syntrophic propionate and acetate enrichments under high-ammonia conditions**

**Eduardo Pinela<sup>1</sup>, Anna Schnürer<sup>1</sup>, Anna Neubeck<sup>2</sup>, Jan Moestedt<sup>1,3,4</sup>, Maria Westerholm<sup>1, \*</sup>**

<sup>1</sup>Department of Molecular Sciences, Swedish University of Agricultural Sciences, Uppsala, SE-750 07, Sweden

<sup>2</sup>Department of Earth Sciences, Uppsala University, Uppsala SE-752 36, Sweden

<sup>3</sup>Department of Biogas R & D, Tekniska verken i Linköping AB (publ.), Box 1500, Linköping, SE-581 15, Sweden

<sup>4</sup>Department of Thematic Studies - Environmental Change, Linköping University, Linköping SE-581 83, Sweden

**\*Correspondence:**

Maria Westerholm

[Maria.Westerholm@slu.se](mailto:Maria.Westerholm@slu.se) ORCID: 0000-0003-2150-8762

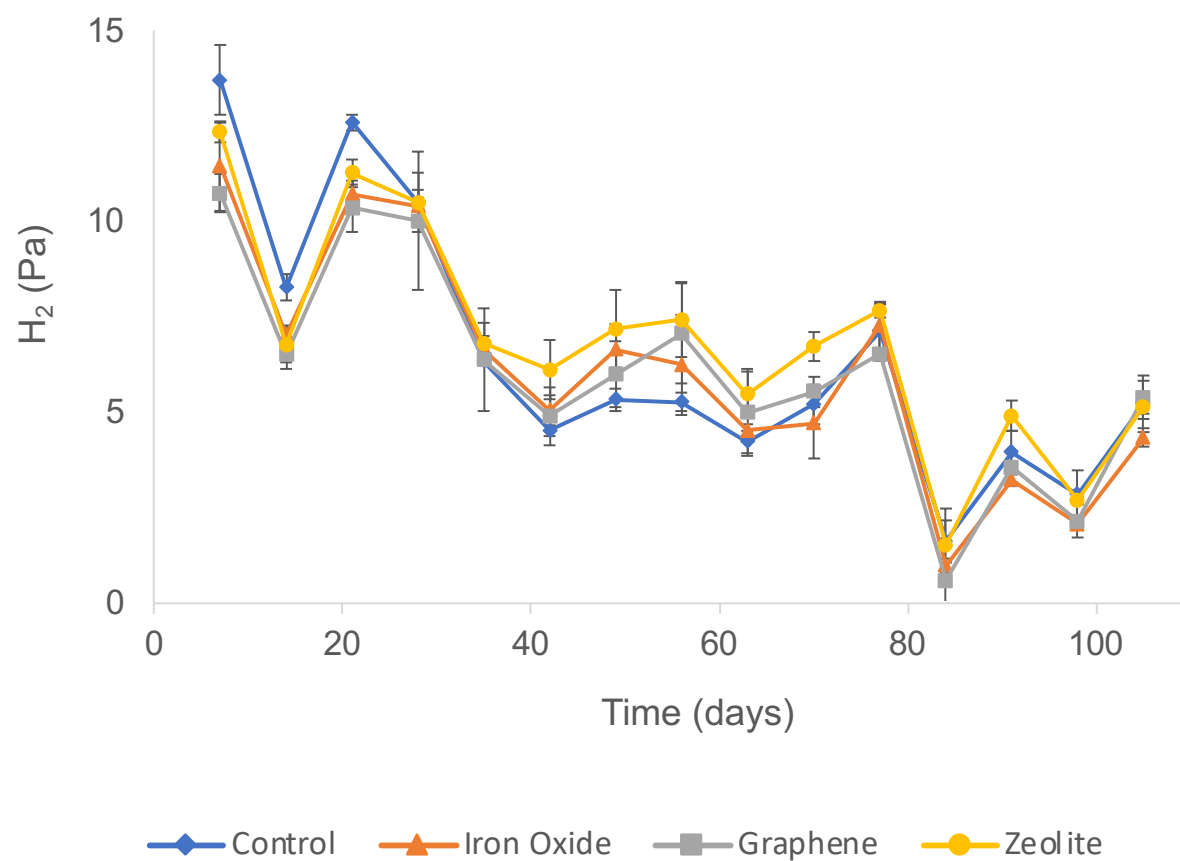

**Fig. S1** Variation in H<sub>2</sub> partial pressure (Pa) during the first round of acetate degradation (A1) in syntrophic acetate-oxidising (SAO) enrichment cultures

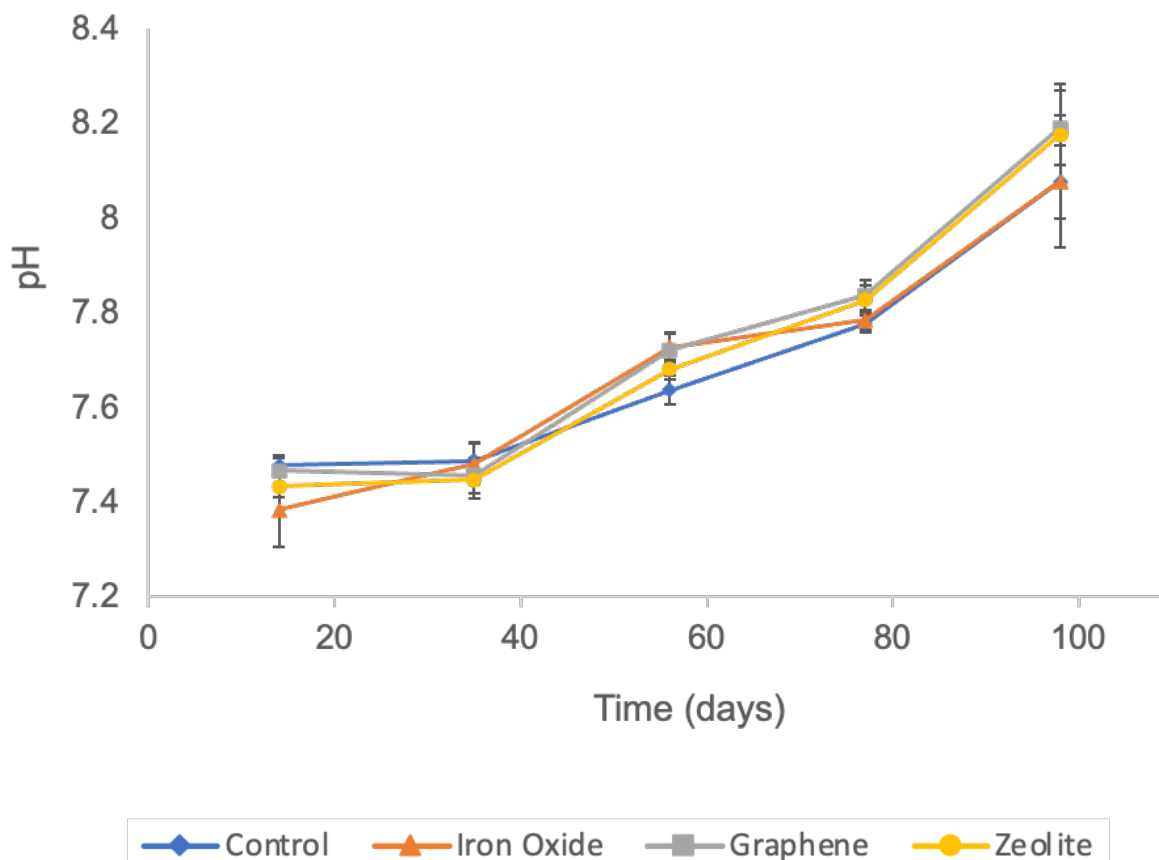

**Fig. S2** Variation in pH during the first round of acetate degradation (A1) in syntrophic acetate-oxidising (SAO) enrichment cultures

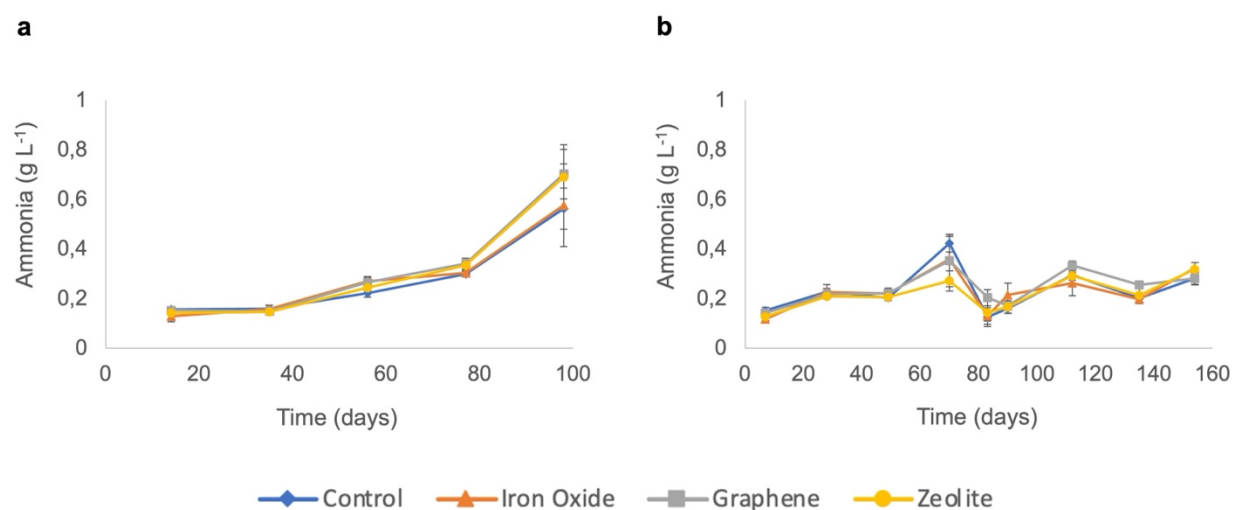

**Fig. S3** Variation in ammonia concentration during the first round of (a) acetate degradation (A1) in syntrophic acetate-oxidising (SAO) enrichment cultures and (b) propionate degradation (P1) in syntrophic propionate-oxidising (SPO) enrichment cultures. Values calculated by entering pH values into the equation in Table S4

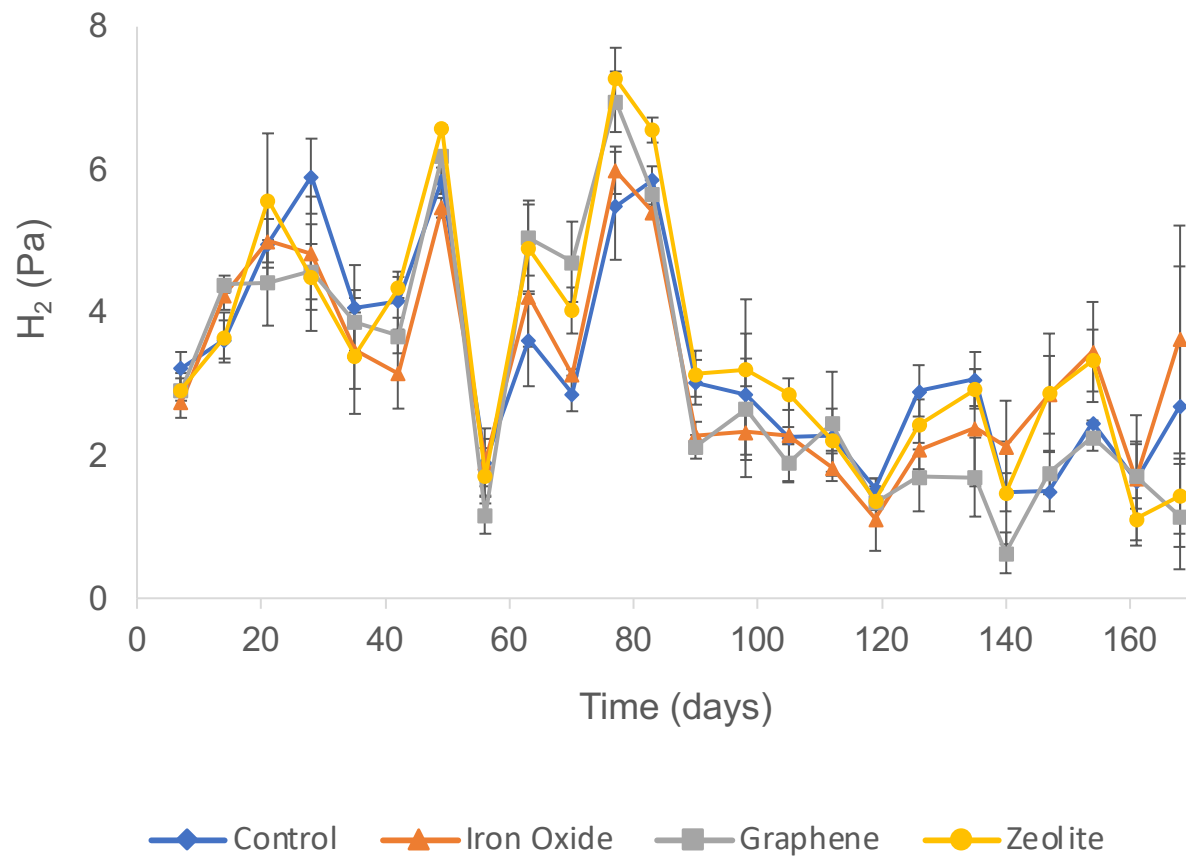

**Fig. S4** Variation in  $H_2$  partial pressure (Pa) during the first round of propionate degradation (P1) in syntrophic propionate-oxidising (SPO) enrichment cultures

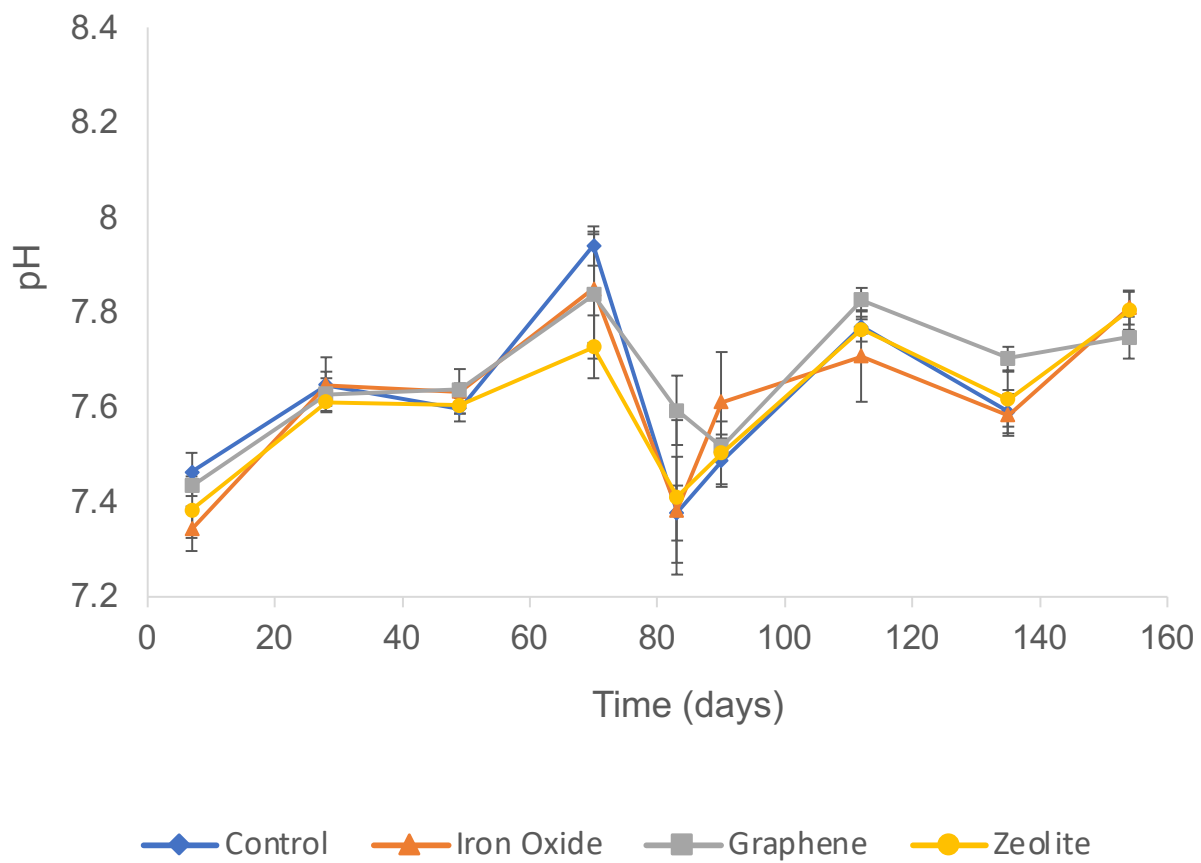

**Fig. S5** Variation in pH during the first round of propionate degradation (P1) in syntrophic propionate-oxidising (SPO) enrichment cultures

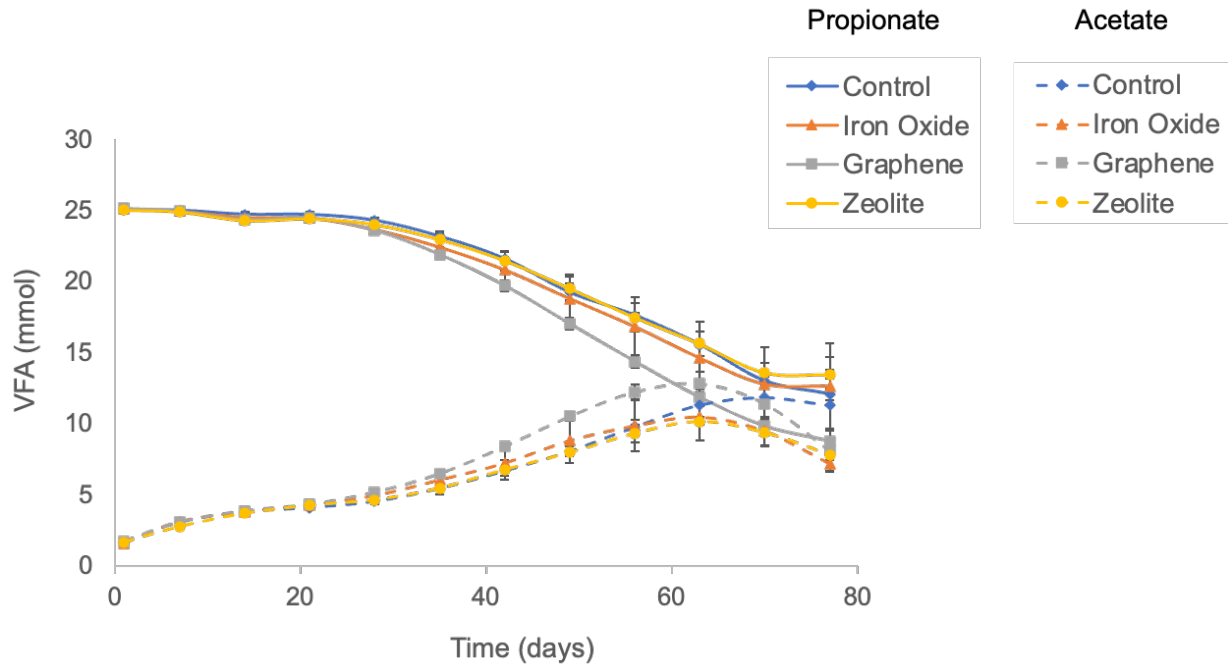

**Fig. S6** Molar conversion of propionate into acetate up to peak acetate level (between days 63-70) during the first round of propionate degradation (P1) in syntrophic propionate-oxidising (SPO) enrichment cultures

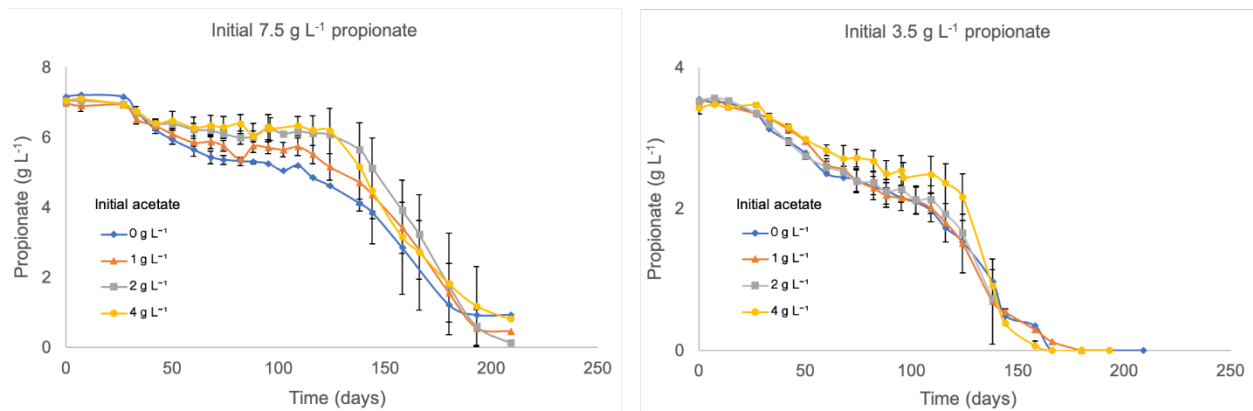

**Fig. S7** Impact of acetate (initial concentration 0, 1, 2 or 4 g L<sup>-1</sup>) on propionate degradation (initial concentration of 7.5 or 3.5 g L<sup>-1</sup>). Note the different scale on the y-axes

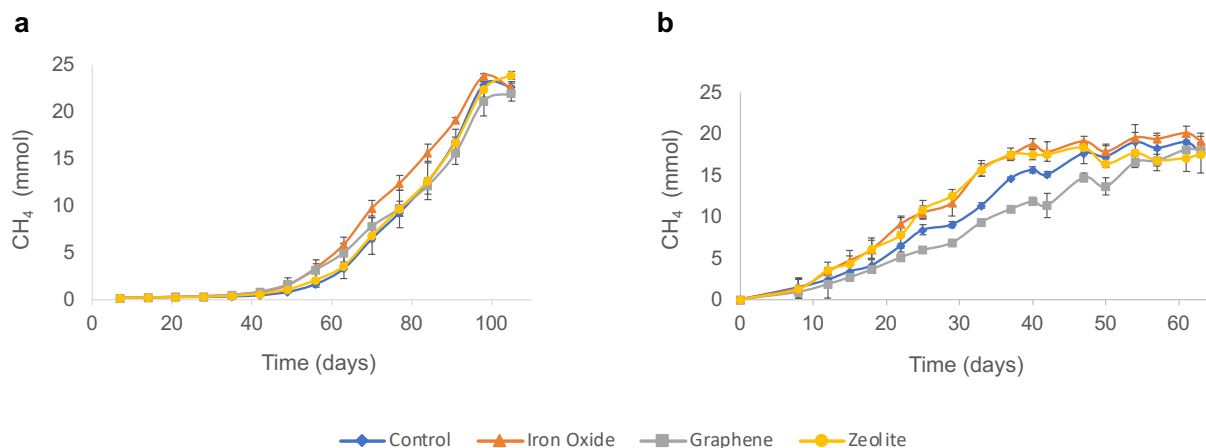

**Fig. S8** Moles of methane produced in the acetate-fed batches during (a) the first (A1) and (b) the second (A2) round of acetate degradation

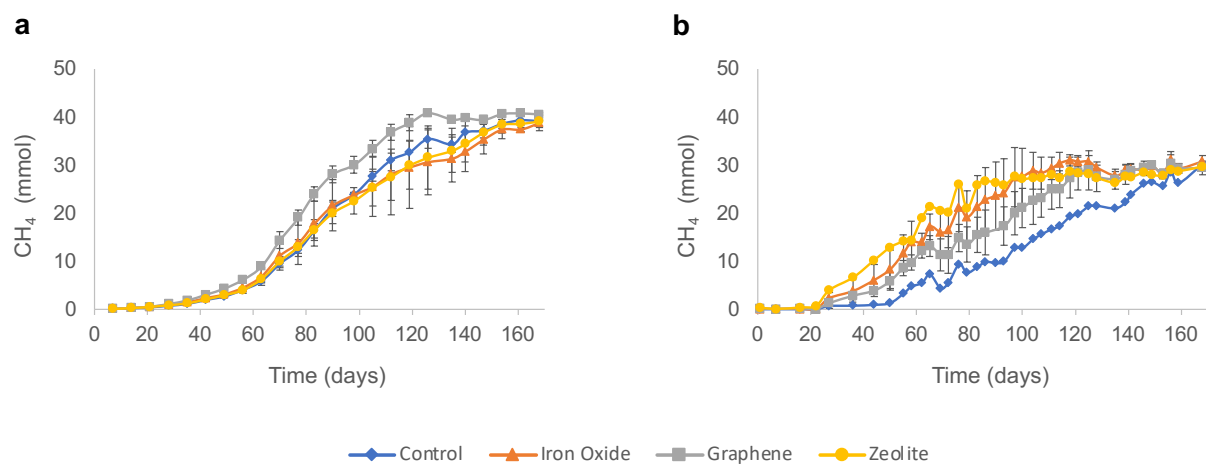

**Fig. S9** Moles of methane produced in the propionate-fed batches during (a) the first (P1) and (b) the second (P2) round of propionate degradation. Averages for the control and zeolite batches during P2 were calculated using duplicates

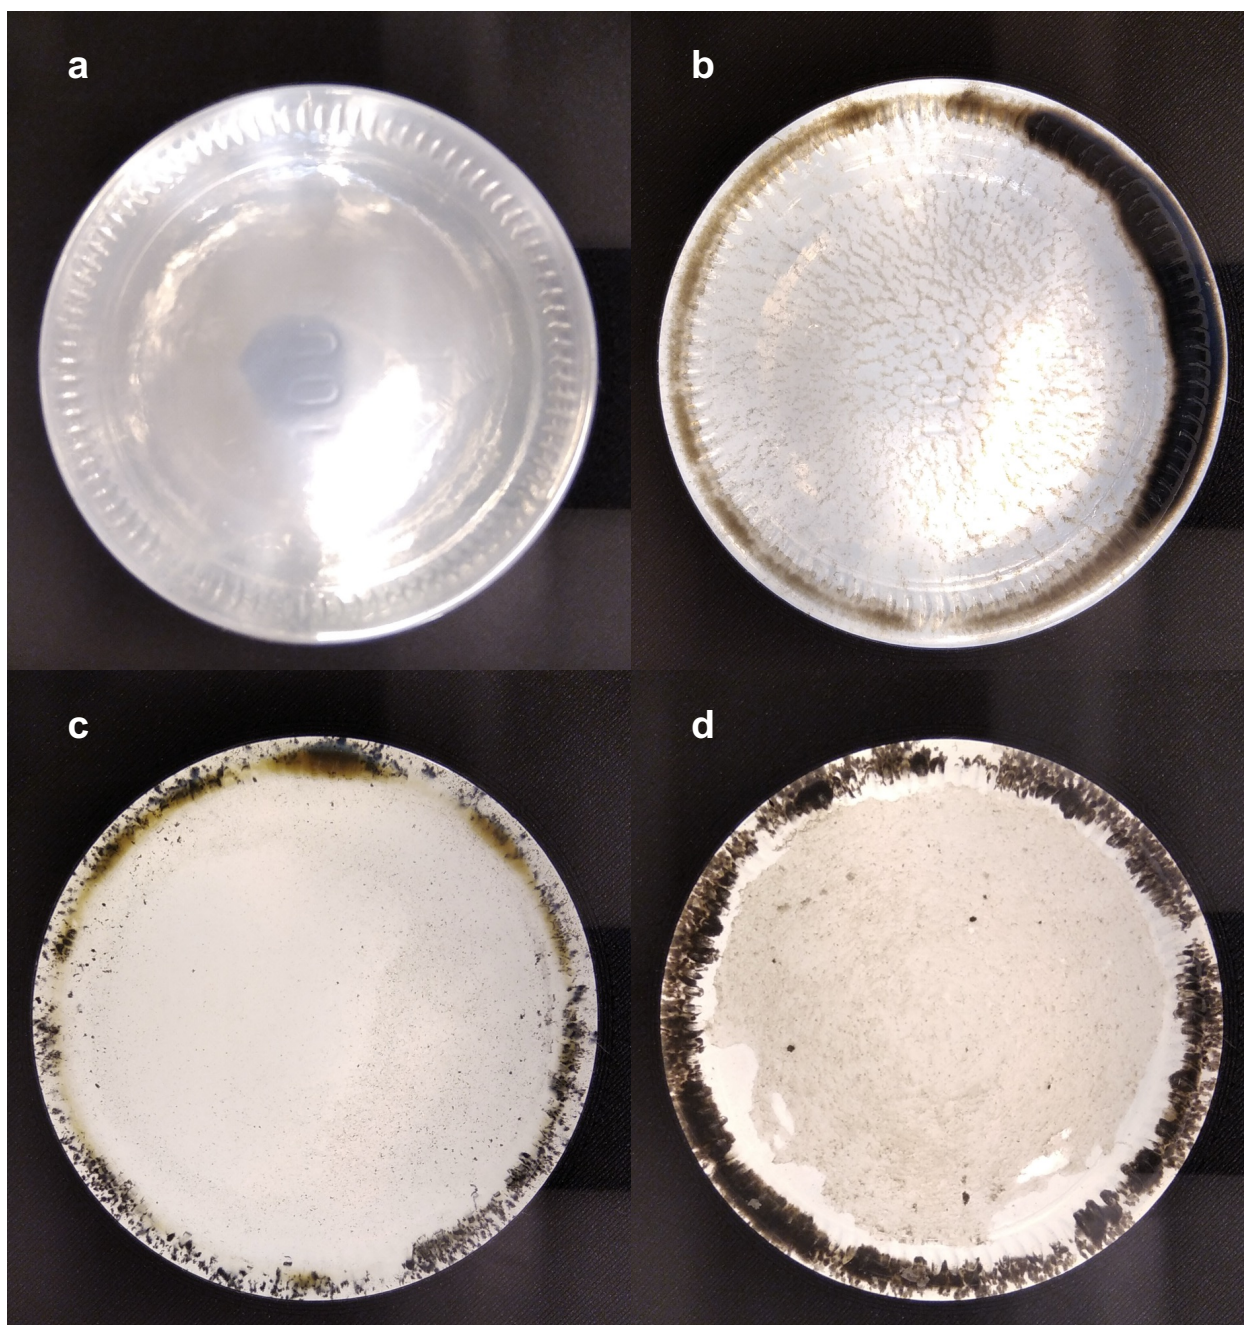

**Fig. S10** Biomass observable to the naked eye at the start of the first round of **(a)** acetate (A1) and **(b)** propionate (P1) degradation, and at the end of the second round of **(c)** acetate (A2) and **(d)** propionate (P2) degradation in the syntrophic acetate-oxidising (SAO) and syntrophic propionate-oxidising (SPO) enrichment cultures, respectively. Images **(a)** and **(b)** were obtained at day 1 and day 3 of A1 and P1, respectively, while images **(c)** and **(d)** were obtained at day 104 and day 168 of A2 and P2, respectively

**Table S1** Experimental set-up of batch trials investigating the impact of presence of acetate without addition of supportive materials on propionate degradation. All batch sets were run in triplicate

| Batch set | Propionate mM (g L <sup>-1</sup> ) | Acetate mM (g L <sup>-1</sup> ) |
|-----------|------------------------------------|---------------------------------|
| 1         | 47 (3.5)                           | 0                               |
| 2         | 47 (3.5)                           | 14 (0.8)                        |
| 3         | 47 (3.5)                           | 29 (1.7)                        |
| 4         | 47 (3.5)                           | 61 (3.6)                        |
| 5         | 95 (7.1)                           | 0                               |
| 6         | 95 (7.1)                           | 14 (0.8)                        |
| 7         | 95 (7.1)                           | 29 (1.7)                        |
| 8         | 95 (7.1)                           | 61 (3.6)                        |

**Table S2** Values used in calculation of acid degradation rates during the first (P1) and second (P2) rounds of propionate degradation and during the first (A1) and second (A2) rounds of acetate degradation

| Round  | Acid       | Batch set    | Acid level at first day of linear degradation phase (g L <sup>-1</sup> ) | Acid level at last day of linear degradation phase (g L <sup>-1</sup> ) | Number of days in between two acid levels | Rate of degradation (g L <sup>-1</sup> day <sup>-1</sup> ) |
|--------|------------|--------------|--------------------------------------------------------------------------|-------------------------------------------------------------------------|-------------------------------------------|------------------------------------------------------------|
| First  | Propionate | Control 1    | 3.279                                                                    | 1.821                                                                   | 35                                        | 0.042                                                      |
|        |            | Control 2    | 3.255                                                                    | 1.892                                                                   | 35                                        | 0.039                                                      |
|        |            | Control 3    | 3.219                                                                    | 1.815                                                                   | 35                                        | 0.040                                                      |
|        |            | Iron Oxide 1 | 3.049                                                                    | 1.389                                                                   | 35                                        | 0.047                                                      |
|        |            | Iron Oxide 2 | 3.146                                                                    | 2.061                                                                   | 35                                        | 0.031                                                      |
|        |            | Iron Oxide 3 | 3.248                                                                    | 1.984                                                                   | 35                                        | 0.036                                                      |
|        |            | Graphene 1   | 3.073                                                                    | 1.348                                                                   | 35                                        | 0.049                                                      |
|        |            | Graphene 2   | 3.045                                                                    | 1.443                                                                   | 35                                        | 0.046                                                      |
|        |            | Graphene 3   | 3.107                                                                    | 1.385                                                                   | 35                                        | 0.049                                                      |
|        |            | Zeolite 1    | 3.281                                                                    | 2.027                                                                   | 35                                        | 0.036                                                      |
|        |            | Zeolite 2    | 3.253                                                                    | 1.903                                                                   | 35                                        | 0.039                                                      |
|        |            | Zeolite 3    | 3.139                                                                    | 1.845                                                                   | 35                                        | 0.037                                                      |
| Second | Propionate | Control 1    | 3.265                                                                    | 1.914                                                                   | 14                                        | 0.096                                                      |
|        |            | Control 2    | 3.158                                                                    | 1.834                                                                   | 14                                        | 0.095                                                      |
|        |            | Control 3    | N/A                                                                      | N/A                                                                     | N/A                                       | N/A                                                        |
|        |            | Iron Oxide 1 | 1.803                                                                    | 0.134                                                                   | 14                                        | 0.119                                                      |
|        |            | Iron Oxide 2 | 3.164                                                                    | 1.409                                                                   | 14                                        | 0.125                                                      |

|       |         |              |       |       |     |       |
|-------|---------|--------------|-------|-------|-----|-------|
| First | Acetate | Iron Oxide 3 | 2.760 | 0.739 | 14  | 0.144 |
|       |         | Graphene 1   | 2.906 | 1.599 | 14  | 0.093 |
|       |         | Graphene 2   | 3.165 | 1.781 | 14  | 0.099 |
|       |         | Graphene 3   | 2.633 | 1.118 | 14  | 0.108 |
|       |         | Zeolite 1    | N/A   | N/A   | N/A | N/A   |
|       |         | Zeolite 2    | 1.524 | 0.200 | 14  | 0.095 |
|       |         | Zeolite 3    | 1.865 | 0.157 | 14  | 0.122 |
|       |         | Control 1    | 2.484 | 0.744 | 21  | 0.083 |
|       |         | Control 2    | 2.502 | 0.748 | 21  | 0.084 |
|       |         | Control 3    | 2.544 | 0.811 | 21  | 0.083 |
|       |         | Iron Oxide 1 | 2.115 | 0.333 | 21  | 0.085 |
|       |         | Iron Oxide 2 | 1.997 | 0.252 | 21  | 0.083 |
|       |         | Iron Oxide 3 | 2.179 | 0.447 | 21  | 0.082 |
|       |         | Graphene 1   | 2.419 | 0.748 | 21  | 0.080 |
|       |         | Graphene 2   | 2.062 | 0.727 | 21  | 0.064 |
|       |         | Graphene 3   | 2.282 | 1.094 | 21  | 0.057 |
|       |         | Zeolite 1    | 2.638 | 1.032 | 21  | 0.077 |
|       |         | Zeolite 2    | 2.213 | 0.396 | 21  | 0.087 |
|       |         | Zeolite 3    | 2.529 | 0.827 | 21  | 0.081 |
|       | Acetate | Control 1    | 2.847 | 0.924 | 25  | 0.077 |
|       |         | Control 2    | 2.891 | 0.890 | 25  | 0.080 |
|       |         | Control 3    | 3.181 | 1.002 | 25  | 0.087 |
|       |         | Iron Oxide 1 | 2.798 | 0.338 | 25  | 0.098 |
|       |         | Iron Oxide 2 | 2.799 | 0.455 | 25  | 0.094 |
|       |         | Iron Oxide 3 | 2.878 | 0.330 | 25  | 0.102 |
|       |         | Graphene 1   | 2.899 | 1.433 | 25  | 0.059 |
|       |         | Graphene 2   | 2.540 | 1.209 | 25  | 0.053 |
|       |         | Graphene 3   | 3.271 | 1.420 | 25  | 0.074 |
|       |         | Zeolite 1    | 2.697 | 0.361 | 25  | 0.093 |
|       |         | Zeolite 2    | 3.238 | 0.198 | 25  | 0.122 |
|       |         | Zeolite 3    | 2.850 | 0.100 | 25  | 0.110 |

---

**Table S3** Carbon balance calculations during the first (P1) and second (P2) rounds of propionate degradation and during the first (A1) and second (A2) rounds of acetate degradation. Theoretical moles of CH<sub>4</sub> were calculated using conversion coefficients of 1.75 and 1 from propionate and acetate, respectively

| Round  | Acid       | Batch set    | Starting moles of acid (mmol) | Theoretical moles of CH <sub>4</sub> (mmol) | Moles of CH <sub>4</sub> obtained (mmol) | Yield (%) |
|--------|------------|--------------|-------------------------------|---------------------------------------------|------------------------------------------|-----------|
| First  | Propionate | Control 1    | 25                            | 43.75                                       | 37.56                                    | 85.85     |
|        |            | Control 2    | 25                            | 43.75                                       | 39.04                                    | 89.23     |
|        |            | Control 3    | 25                            | 43.75                                       | 40.81                                    | 93.27     |
|        |            | Iron Oxide 1 | 25                            | 43.75                                       | 39.63                                    | 90.59     |
|        |            | Iron Oxide 2 | 25                            | 43.75                                       | 38.14                                    | 87.18     |
|        |            | Iron Oxide 3 | 25                            | 43.75                                       | 38.67                                    | 88.39     |
|        |            | Graphene 1   | 25                            | 43.75                                       | 40.90                                    | 93.49     |
|        |            | Graphene 2   | 25                            | 43.75                                       | 40.25                                    | 92.01     |
|        |            | Graphene 3   | 25                            | 43.75                                       | 40.57                                    | 92.74     |
|        |            | Zeolite 1    | 25                            | 43.75                                       | 39.89                                    | 91.19     |
|        |            | Zeolite 2    | 25                            | 43.75                                       | 41.03                                    | 93.78     |
|        |            | Zeolite 3    | 25                            | 43.75                                       | 36.49                                    | 83.40     |
| Second | Propionate | Control 1    | 25                            | 43.75                                       | 34.83                                    | 79.61     |
|        |            | Control 2    | 25                            | 43.75                                       | 28.65                                    | 65.47     |
|        |            | Control 3    | 25                            | 43.75                                       | 27.79                                    | 63.53     |
|        |            | Iron Oxide 1 | 25                            | 43.75                                       | 32.09                                    | 73.35     |
|        |            | Iron Oxide 2 | 25                            | 43.75                                       | 29.69                                    | 67.87     |
|        |            | Iron Oxide 3 | 25                            | 43.75                                       | 30.86                                    | 70.55     |
|        |            | Graphene 1   | 25                            | 43.75                                       | 30.96                                    | 70.76     |
|        |            | Graphene 2   | 25                            | 43.75                                       | 29.68                                    | 67.84     |
|        |            | Graphene 3   | 25                            | 43.75                                       | 28.10                                    | 64.24     |
|        |            | Zeolite 1    | 25                            | 43.75                                       | 24.96                                    | 57.06     |
|        |            | Zeolite 2    | 25                            | 43.75                                       | 33.09                                    | 75.64     |
|        |            | Zeolite 3    | 25                            | 43.75                                       | 31.51                                    | 72.02     |
| First  | Acetate    | Control 1    | 25                            | 25                                          | 22.53                                    | 90.12     |
|        |            | Control 2    | 25                            | 25                                          | 23.26                                    | 93.06     |
|        |            | Control 3    | 25                            | 25                                          | 22.14                                    | 88.55     |
|        |            | Iron Oxide 1 | 25                            | 25                                          | 22.55                                    | 90.18     |
|        |            | Iron Oxide 2 | 25                            | 25                                          | 23.37                                    | 93.50     |

|        |         |              |    |    |       |       |
|--------|---------|--------------|----|----|-------|-------|
| Second | Acetate | Iron Oxide 3 | 25 | 25 | 21.70 | 86.81 |
|        |         | Graphene 1   | 25 | 25 | 23.04 | 92.16 |
|        |         | Graphene 2   | 25 | 25 | 21.54 | 86.16 |
|        |         | Graphene 3   | 25 | 25 | 21.27 | 85.09 |
|        |         | Zeolite 1    | 25 | 25 | 24.31 | 97.23 |
|        |         | Zeolite 2    | 25 | 25 | 23.40 | 93.59 |
|        |         | Zeolite 3    | 25 | 25 | 24.04 | 96.14 |
|        |         | Control 1    | 25 | 25 | 19.44 | 77.77 |
|        |         | Control 2    | 25 | 25 | 17.76 | 71.03 |
|        |         | Control 3    | 25 | 25 | 19.81 | 79.25 |
|        |         | Iron Oxide 1 | 25 | 25 | 19.42 | 77.70 |
|        |         | Iron Oxide 2 | 25 | 25 | 19.83 | 79.31 |
|        |         | Iron Oxide 3 | 25 | 25 | 21.02 | 84.06 |
|        |         | Graphene 1   | 25 | 25 | 18.17 | 72.68 |
|        |         | Graphene 2   | 25 | 25 | 18.49 | 73.95 |
|        |         | Graphene 3   | 25 | 25 | 17.77 | 71.07 |
|        |         | Zeolite 1    | 25 | 25 | 15.33 | 61.32 |
|        |         | Zeolite 2    | 25 | 25 | 18.66 | 74.65 |
|        |         | Zeolite 3    | 25 | 25 | 17.30 | 69.19 |

**Table S4** Equation and variables used in calculation of ammonia values

|                                      |                                                                                 |
|--------------------------------------|---------------------------------------------------------------------------------|
| Temperature (K)                      | $273.15 + \text{Temperature } (^{\circ}\text{C})$                               |
| pKa                                  | $0.09018 + \left( \frac{2729.92}{\text{Temperature (K)}} \right)$               |
| NH <sub>3</sub> (g L <sup>-1</sup> ) | $\frac{\text{NH}_4 \text{ (g L}^{-1}\text{)}}{(1+10^{(\text{pKa}-\text{pH})})}$ |
